# Supplementary material for: Polo like kinase 1 expression in cervical cancer tissues generated from multiple detection methods
Source: PeerJ. 2020 Dec 8;8:e10458. doi: 10.7717/peerj.10458 (PMC7731657; doi:10.7717/peerj.10458)
Supplement: Supplemental Information 8 [file peerj-08-10458-s008.xlsx]

## Sheet: Sheet1
Supplemental Table 1. Information of comparisons conducted in microarray data to get the DEG lists
ID	First author	Published year	Country	Platform	Cancer Subtype	Number of Cancer samples	Number of Non-cancer samples	Sample type
GSE138080	Renske DM Steenbergen	2020	Netherlands	GPL23871	CESC	10	10	tissue
GSE27678	Ian Roberts	2013	United Kingdom	GPL570	CESC	30	3	tissue and cell
GSE27678	Ian Roberts	2013	United Kingdom	GPL571	CESC	32	12	tissue and cell
GSE7803	Rork Kuick	2007	USA	GPL96	CESC	21	13	tissue
GSE9750	Murty Vundavalli	2008	USA	GPL96	CESC	35	24	tissue and cell
GSE52904	INGRID MEDINA MARTINEZ	2015	Mexico	GPL6244	CESC	51	17	tissue
GSE63514	Johan den Boon	2015	USA	GPL570	CESC	28	24	tissue
GSE52904	INGRID MEDINA MARTINEZ	2015	Mexico	GPL6244	Cervical adenocarcinoma	4	17	tissue
Notes: CESC: cervical squamous cell carcinoma
