# Supplementary material for: Polo like kinase 1 expression in cervical cancer tissues generated from multiple detection methods
Source: PeerJ. 2020 Dec 8;8:e10458. doi: 10.7717/peerj.10458 (PMC7731657; doi:10.7717/peerj.10458)
Supplement: Supplemental Information 9 [file peerj-08-10458-s009.xlsx]

## Sheet: Sheet1
Supplemental Table 2. Gene ontology and Kyoto Encyclopedia of Genes and Genomes pathway analysis for genes positively correlated with PLK1 in CESC
Category	ID	Description	GeneRatio	BgRatio	pvalue	p.adjust	qvalue	geneID	Count
Biological process	GO:0006260	DNA replication	26/75	260/17913	2.44422e-29	3.0015e-26	2.31558e-26	GINS4/CDT1/CLSPN/CHTF18/MCM10/RNASEH2A/RECQL4/EXO1/CDC45/RRM2/RPA3/RFC5/RAD51/PRIM1/POLE2/POLD1/ORC1/MCM6/MCM5/MCM4/MCM3/MCM2/CDC6/CCNE1/CCNA2/BRCA1	26
Biological process	GO:0044843	cell cycle G1/S phase transition	21/75	288/17913	9.94524e-21	6.10638e-18	4.7109e-18	CDT1/MCM10/GTSE1/KIF14/CDC45/AURKA/RRM2/RPA3/PRIM1/POLE2/ORC1/MCM6/MCM5/MCM4/MCM3/MCM2/E2F1/CDKN3/CDC6/CCNE1/CCNA2	21
Biological process	GO:0000082	G1/S transition of mitotic cell cycle	20/75	269/17913	6.42346e-20	2.62934e-17	2.02846e-17	CDT1/MCM10/GTSE1/KIF14/CDC45/AURKA/RRM2/RPA3/PRIM1/POLE2/ORC1/MCM6/MCM5/MCM4/MCM3/MCM2/E2F1/CDKN3/CDC6/CCNE1	20
Biological process	GO:0006261	DNA-dependent DNA replication	16/75	130/17913	1.36527e-19	3.60499e-17	2.78115e-17	GINS4/CDT1/CHTF18/RPA3/RFC5/RAD51/PRIM1/POLE2/POLD1/MCM6/MCM5/MCM4/MCM3/MCM2/CDC6/CCNE1	16
Biological process	GO:0140014	mitotic nuclear division	19/75	237/17913	1.46783e-19	3.60499e-17	2.78115e-17	CDCA5/CDT1/ANLN/UBE2S/KIF4A/TPX2/UBE2C/SPAG5/TACC3/KIF14/NCAPD2/TRIP13/PRC1/AURKA/MYBL2/KIFC1/KIF11/CDC6/BUB1B	19
Cellular component	GO:0098687	chromosomal region	18/77	337/18678	1.62703e-15	2.66833e-13	1.84968e-13	CDCA5/CDT1/CENPM/HJURP/OIP5/SPAG5/RECQL4/RAD51/POLD1/ORC1/MCM6/MCM5/MCM4/MCM3/MCM2/CENPA/BUB1B/BIRC5	18
Cellular component	GO:0042555	MCM complex	5/77	11/18678	4.72887e-10	2.7659e-08	1.91731e-08	MCM6/MCM5/MCM4/MCM3/MCM2	5
Cellular component	GO:0000793	condensed chromosome	11/77	199/18678	5.50833e-10	2.7659e-08	1.91731e-08	CDCA5/CDT1/CENPM/HJURP/SPAG5/NCAPD2/RAD51/CENPA/BUB1B/BRCA1/BIRC5	11
Cellular component	GO:0044454	nuclear chromosome part	15/77	469/18678	6.74609e-10	2.7659e-08	1.91731e-08	CDCA5/ASF1B/RPA3/RAD51/POLE2/POLD1/ORC1/MCM6/MCM5/MCM4/MCM3/MCM2/E2F1/CENPA/BRCA1	15
Cellular component	GO:0005819	spindle	12/77	326/18678	8.6969e-09	2.85258e-07	1.9774e-07	CKAP2L/KIF4A/TPX2/SPAG5/TACC3/KIF20A/KIF14/PRC1/AURKA/KIF11/CDC6/BUB1B	12
Molecular function	GO:0008094	DNA-dependent ATPase activity	7/73	72/16969	2.39528e-08	2.87434e-06	2.06751e-06	CHTF18/POLQ/RECQL4/RFC5/RAD51/MCM6/MCM4	7
Molecular function	GO:0043142	single-stranded DNA-dependent ATPase activity	4/73	12/16969	1.51994e-07	9.11963e-06	6.55973e-06	CHTF18/POLQ/RFC5/RAD51	4
Molecular function	GO:0140097	catalytic activity, acting on DNA	8/73	152/16969	2.83006e-07	1.13203e-05	8.14264e-06	POLQ/RECQL4/EXO1/RAD54L/POLD1/MCM6/MCM4/LIG1	8
Molecular function	GO:0004386	helicase activity	7/73	128/16969	1.26986e-06	3.80959e-05	2.74023e-05	RECQL4/RAD54L/MCM6/MCM5/MCM4/MCM3/MCM2	7
Molecular function	GO:0042623	ATPase activity, coupled	8/73	218/16969	4.28233e-06	0.000102776	7.39265e-05	CHTF18/POLQ/KIF14/RECQL4/RFC5/RAD51/MCM6/MCM4	8
KEGG pathway	hsa03030	DNA replication	12/45	36/8047	2.15249e-19	1.42065e-17	1.13289e-17	RNASEH2A/RPA3/RFC5/PRIM1/POLE2/POLD1/MCM6/MCM5/MCM4/MCM3/MCM2/LIG1	12
KEGG pathway	hsa04110	Cell cycle	13/45	124/8047	7.02054e-14	2.31678e-12	1.84751e-12	PTTG1/CDC45/ORC1/MCM6/MCM5/MCM4/MCM3/MCM2/E2F1/CDC6/CCNE1/CCNA2/BUB1B	13
KEGG pathway	hsa03430	Mismatch repair	5/45	23/8047	1.35845e-07	2.98859e-06	2.38324e-06	EXO1/RPA3/RFC5/POLD1/LIG1	5
KEGG pathway	hsa03440	Homologous recombination	5/45	41/8047	2.80754e-06	4.63245e-05	3.69414e-05	RAD54L/RPA3/RAD51/POLD1/BRCA1	5
KEGG pathway	hsa03420	Nucleotide excision repair	5/45	47/8047	5.60538e-06	7.3991e-05	5.9004e-05	RPA3/RFC5/POLE2/POLD1/LIG1	5
