# Supplementary material for: Polo like kinase 1 expression in cervical cancer tissues generated from multiple detection methods
Source: PeerJ. 2020 Dec 8;8:e10458. doi: 10.7717/peerj.10458 (PMC7731657; doi:10.7717/peerj.10458)
Supplement: Supplemental Information 10 [file peerj-08-10458-s010.xlsx]

## Sheet: Sheet1
Supplemental Table 3. Gene ontology and Kyoto Encyclopedia of Genes and Genomes pathway analysis for genes negatively correlated with PLK1 in CESC
Category	ID	Description	GeneRatio	BgRatio	pvalue	p.adjust	qvalue	geneID	Count
Biological process	GO:0001655	urogenital system development	13/95	324/17913	1.60808e-08	2.95726e-05	2.47475e-05	GREB1L/KLHL3/SPRY1/SLIT2/WT1/TEK/SALL1/PDGFRA/ID4/FGFR1/ESR1/EMX2/AR	13
Biological process	GO:0072001	renal system development	10/95	291/17913	3.2823e-06	0.00217415	0.00181941	GREB1L/KLHL3/SPRY1/SLIT2/WT1/TEK/SALL1/PDGFRA/FGFR1/EMX2	10
Biological process	GO:0048806	genitalia development	5/95	46/17913	4.35417e-06	0.00217415	0.00181941	GREB1L/WT1/PDGFRA/ESR1/AR	5
Biological process	GO:0061138	morphogenesis of a branching epithelium	8/95	178/17913	4.72898e-06	0.00217415	0.00181941	GREB1L/SPRY1/SLIT2/WT1/SALL1/FGFR1/ESR1/AR	8
Biological process	GO:0030539	male genitalia development	4/95	23/17913	6.08429e-06	0.00219026	0.00183289	GREB1L/WT1/PDGFRA/AR	4
Cellular component	GO:0043235	receptor complex	6/93	292/18678	0.00339177	0.325977	0.309493	SORBS1/TRPC1/NR3C2/ITPR2/FGFR1/CEACAM1	6
Cellular component	GO:0005911	cell-cell junction	7/93	414/18678	0.00461705	0.325977	0.309493	CGNL1/TMEM47/SORBS1/TEK/PIK3R1/CEACAM1/ANK2	7
Cellular component	GO:0005902	microvillus	3/93	80/18678	0.00744574	0.325977	0.309493	TEK/PDGFRA/CEACAM1	3
Cellular component	GO:0009925	basal plasma membrane	2/93	28/18678	0.00852228	0.325977	0.309493	TEK/CEACAM1	2
Cellular component	GO:0016363	nuclear matrix	3/93	106/18678	0.0159407	0.423175	0.401776	SORBS1/SATB1/RUNX1T1	3
Molecular function	GO:0005158	insulin receptor binding	3/87	20/16969	0.000139325	0.0169311	0.0153518	SORBS1/PIK3R1/ENPP1	3
Molecular function	GO:0003707	steroid hormone receptor activity	4/87	54/16969	0.000167635	0.0169311	0.0153518	RORB/NR3C2/ESR1/AR	4
Molecular function	GO:0019199	transmembrane receptor protein kinase activity	4/87	65/16969	0.000343824	0.0198581	0.0180058	PDGFRA/DDR2/LTBP1/FGFR1	4
Molecular function	GO:0019838	growth factor binding	5/87	121/16969	0.000393229	0.0198581	0.0180058	TGFB3/TEK/PDGFRA/LTBP1/FGFR1	5
Molecular function	GO:0035591	signaling adaptor activity	4/87	78/16969	0.000688667	0.0278221	0.025227	SORBS1/SH3BGRL/PIK3R1/GAB1	4
KEGG pathway	hsa04014	Ras signaling pathway	8/40	232/8047	1.46544e-05	0.00190134	0.00115081	SHC3/AKT3/TEK/PIK3R1/PDGFRA/GAB1/FGFR1/FGF9	8
KEGG pathway	hsa05218	Melanoma	5/40	72/8047	2.56995e-05	0.00190134	0.00115081	AKT3/PIK3R1/PDGFRA/FGFR1/FGF9	5
KEGG pathway	hsa01521	EGFR tyrosine kinase inhibitor resistance	5/40	79/8047	4.03571e-05	0.00190134	0.00115081	SHC3/AKT3/PIK3R1/PDGFRA/GAB1	5
KEGG pathway	hsa05205	Proteoglycans in cancer	7/40	205/8047	5.73617e-05	0.00190134	0.00115081	AKT3/PIK3R1/ITPR2/GAB1/FGFR1/ESR1/ANK2	7
KEGG pathway	hsa05224	Breast cancer	6/40	147/8047	7.71579e-05	0.00190134	0.00115081	SHC3/AKT3/PIK3R1/FGFR1/FGF9/ESR1	6
