# Supplementary material for: Polo like kinase 1 expression in cervical cancer tissues generated from multiple detection methods
Source: PeerJ. 2020 Dec 8;8:e10458. doi: 10.7717/peerj.10458 (PMC7731657; doi:10.7717/peerj.10458)
Supplement: Supplemental Information 11 [file peerj-08-10458-s011.xlsx]

## Sheet: Sheet1
Supplemental Table 4. Gene ontology and Kyoto Encyclopedia of Genes and Genomes pathway analysis for genes positively correlated with PLK1 in cervical adenocarcionma
Category	ID	Description	GeneRatio	BgRatio	pvalue	p.adjust	qvalue	geneID	Count
Biological process	GO:0000280	nuclear division	53/173	357/17913	2.35627e-48	4.47691e-45	3.38558e-45	ASPM/BRIP1/KIF18A/CDT1/NCAPG/CDCA8/SPDL1/NUSAP1/PSMC3IP/RACGAP1/FBXO5/RAD54B/KIF4A/NUP62/NCAPH/NCAPD3/TPX2/ZWINT/UBE2C/KIF2C/SPAG5/SMC2/TACC3/NDC80/SMC4/KIF14/NCAPD2/DLGAP5/KNTC1/KIF23/TRIP13/AURKB/PKMYT1/PRC1/TTK/TOP2A/AURKA/NEK2/MYBL2/MKI67/MAD2L1/KIFC1/KIF11/FANCA/CKS2/CHEK1/CENPF/CENPE/CDC20/CDC6/CCNB1/BUB1B/BRCA2	53
Biological process	GO:0006260	DNA replication	47/173	260/17913	6.94916e-47	6.6017e-44	4.99242e-44	GINS4/BRIP1/CDT1/RMI1/ATAD5/E2F8/CLSPN/MCM10/RFWD3/DTL/GMNN/FBXO5/POLA2/ORC6/TOPBP1/DBF4/POLD3/CHAF1A/GINS1/RECQL4/EXO1/CCNE2/CDC45/CDC7/RRM2/RFC4/RFC3/RAD51/PRIM1/POLE2/POLD1/PCNA/ORC1/MCM7/MCM6/MCM4/MCM3/MCM2/FEN1/DNA2/CHEK1/CDC6/CDK1/CCNE1/CCNA2/BRCA2/BRCA1	47
Biological process	GO:0048285	organelle fission	53/173	395/17913	5.85433e-46	3.51695e-43	2.65963e-43	ASPM/BRIP1/KIF18A/CDT1/NCAPG/CDCA8/SPDL1/NUSAP1/PSMC3IP/RACGAP1/FBXO5/RAD54B/KIF4A/NUP62/NCAPH/NCAPD3/TPX2/ZWINT/UBE2C/KIF2C/SPAG5/SMC2/TACC3/NDC80/SMC4/KIF14/NCAPD2/DLGAP5/KNTC1/KIF23/TRIP13/AURKB/PKMYT1/PRC1/TTK/TOP2A/AURKA/NEK2/MYBL2/MKI67/MAD2L1/KIFC1/KIF11/FANCA/CKS2/CHEK1/CENPF/CENPE/CDC20/CDC6/CCNB1/BUB1B/BRCA2	53
Biological process	GO:0140014	mitotic nuclear division	45/173	237/17913	7.40411e-46	3.51695e-43	2.65963e-43	KIF18A/CDT1/NCAPG/CDCA8/SPDL1/NUSAP1/RACGAP1/FBXO5/KIF4A/NUP62/NCAPH/NCAPD3/TPX2/ZWINT/UBE2C/KIF2C/SPAG5/SMC2/TACC3/NDC80/SMC4/KIF14/NCAPD2/DLGAP5/KNTC1/KIF23/TRIP13/AURKB/PKMYT1/PRC1/TTK/AURKA/NEK2/MYBL2/MKI67/MAD2L1/KIFC1/KIF11/CHEK1/CENPF/CENPE/CDC20/CDC6/CCNB1/BUB1B	45
Biological process	GO:0007059	chromosome segregation	47/173	275/17913	1.12929e-45	4.29131e-43	3.24523e-43	SKA1/BRIP1/KIF18A/CDT1/NCAPG/SPC25/CENPN/HJURP/CDCA8/SPDL1/NUSAP1/RACGAP1/FBXO5/KIF4A/NUP62/NCAPH/NCAPD3/ZWINT/KIF2C/SPAG5/SMC2/TACC3/NDC80/SMC4/KIF14/NCAPD2/DLGAP5/KIF23/TRIP13/AURKB/PRC1/TTK/TOP2A/NEK2/MKI67/MAD2L1/KIFC1/FEN1/ECT2/CENPF/CENPE/CDC20/CDC6/CCNB1/BUB1B/BRCA1/BIRC5	47
Cellular component	GO:0140097	catalytic activity, acting on DNA	22/167	152/16969	1.03754e-19	2.79099e-17	2.21707e-17	BRIP1/NEIL3/ERCC6L/RAD54B/POLA2/POLQ/POLD3/RECQL4/EXO1/RAD54L/TOP2A/POLD1/PCNA/MCM7/MCM6/MCM4/LIG1/FEN1/DNMT3B/DNMT1/DNA2/DKC1	22
Cellular component	GO:0008094	DNA-dependent ATPase activity	13/167	72/16969	2.17415e-13	2.92423e-11	2.32291e-11	BRIP1/ERCC6L/RAD54B/POLQ/RECQL4/TOP2A/RFC4/RFC3/RAD51/MCM7/MCM6/MCM4/DNA2	13
Cellular component	GO:0016887	ATPase activity	19/167	280/16969	3.99711e-11	3.58408e-09	2.84707e-09	BRIP1/KIF18A/ATAD5/ATP13A3/ERCC6L/ATAD2/RAD54B/POLQ/KIF14/RECQL4/TOP2A/HLTF/RFC4/RFC3/RAD51/MCM7/MCM6/MCM4/DNA2	19
Cellular component	GO:0003682	chromatin binding	23/167	437/16969	5.45983e-11	3.67173e-09	2.9167e-09	BRIP1/CDT1/GMNN/NUP62/CBX5/POLQ/CHAF1A/EXO1/VRK1/TOP2A/SHMT2/RBL1/RAD51/POLD1/PCNA/ORC1/EZH2/DNMT3B/DNMT1/CKS2/CENPF/CENPA/CDK1	23
Cellular component	GO:0004386	helicase activity	13/167	128/16969	4.03828e-10	2.14215e-08	1.70165e-08	BRIP1/ERCC6L/RAD54B/RECQL4/RAD54L/HLTF/MCM7/MCM6/MCM4/MCM3/MCM2/HELLS/DNA2	13
Molecular function	GO:0140097	catalytic activity, acting on DNA	22/167	152/16969	1.03754e-19	2.79099e-17	2.21707e-17	BRIP1/NEIL3/ERCC6L/RAD54B/POLA2/POLQ/POLD3/RECQL4/EXO1/RAD54L/TOP2A/POLD1/PCNA/MCM7/MCM6/MCM4/LIG1/FEN1/DNMT3B/DNMT1/DNA2/DKC1	22
Molecular function	GO:0008094	DNA-dependent ATPase activity	13/167	72/16969	2.17415e-13	2.92423e-11	2.32291e-11	BRIP1/ERCC6L/RAD54B/POLQ/RECQL4/TOP2A/RFC4/RFC3/RAD51/MCM7/MCM6/MCM4/DNA2	13
Molecular function	GO:0016887	ATPase activity	19/167	280/16969	3.99711e-11	3.58408e-09	2.84707e-09	BRIP1/KIF18A/ATAD5/ATP13A3/ERCC6L/ATAD2/RAD54B/POLQ/KIF14/RECQL4/TOP2A/HLTF/RFC4/RFC3/RAD51/MCM7/MCM6/MCM4/DNA2	19
Molecular function	GO:0003682	chromatin binding	23/167	437/16969	5.45983e-11	3.67173e-09	2.9167e-09	BRIP1/CDT1/GMNN/NUP62/CBX5/POLQ/CHAF1A/EXO1/VRK1/TOP2A/SHMT2/RBL1/RAD51/POLD1/PCNA/ORC1/EZH2/DNMT3B/DNMT1/CKS2/CENPF/CENPA/CDK1	23
Molecular function	GO:0004386	helicase activity	13/167	128/16969	4.03828e-10	2.14215e-08	1.70165e-08	BRIP1/ERCC6L/RAD54B/RECQL4/RAD54L/HLTF/MCM7/MCM6/MCM4/MCM3/MCM2/HELLS/DNA2	13
KEGG pathway	hsa04110	Cell cycle	27/85	124/8047	3.21235e-29	2.95536e-27	2.40081e-27	ORC6/DBF4/CCNE2/CCNB2/PKMYT1/CDC45/CDC7/TTK/RBL1/PCNA/ORC1/MCM7/MCM6/MCM4/MCM3/MCM2/MAD2L1/E2F1/CHEK1/CDC25A/CDC20/CDC6/CDK1/CCNE1/CCNB1/CCNA2/BUB1B	27
KEGG pathway	hsa03030	DNA replication	16/85	36/8047	3.35769e-23	1.54454e-21	1.25472e-21	POLA2/POLD3/RFC4/RFC3/PRIM1/POLE2/POLD1/PCNA/MCM7/MCM6/MCM4/MCM3/MCM2/LIG1/FEN1/DNA2	16
KEGG pathway	hsa03440	Homologous recombination	9/85	41/8047	2.82681e-10	8.66887e-09	7.04222e-09	BRIP1/RAD54B/TOPBP1/POLD3/RAD54L/RAD51/POLD1/BRCA2/BRCA1	9
KEGG pathway	hsa03410	Base excision repair	8/85	33/8047	1.24167e-09	2.85584e-08	2.31996e-08	NEIL3/POLD3/POLE2/POLD1/PCNA/LIG1/FEN1/PARP1	8
KEGG pathway	hsa03430	Mismatch repair	7/85	23/8047	2.44178e-09	4.49287e-08	3.64981e-08	POLD3/EXO1/RFC4/RFC3/POLD1/PCNA/LIG1	7
